# Supplementary material for: Black Bear Behavior and Movements Are Not Definitive Measures of Anthropogenic Food Use
Source: MDPI journal article supplement (doi:10.3390/ani13050950), 2023-03-06
Supplement: s1 [file s1]

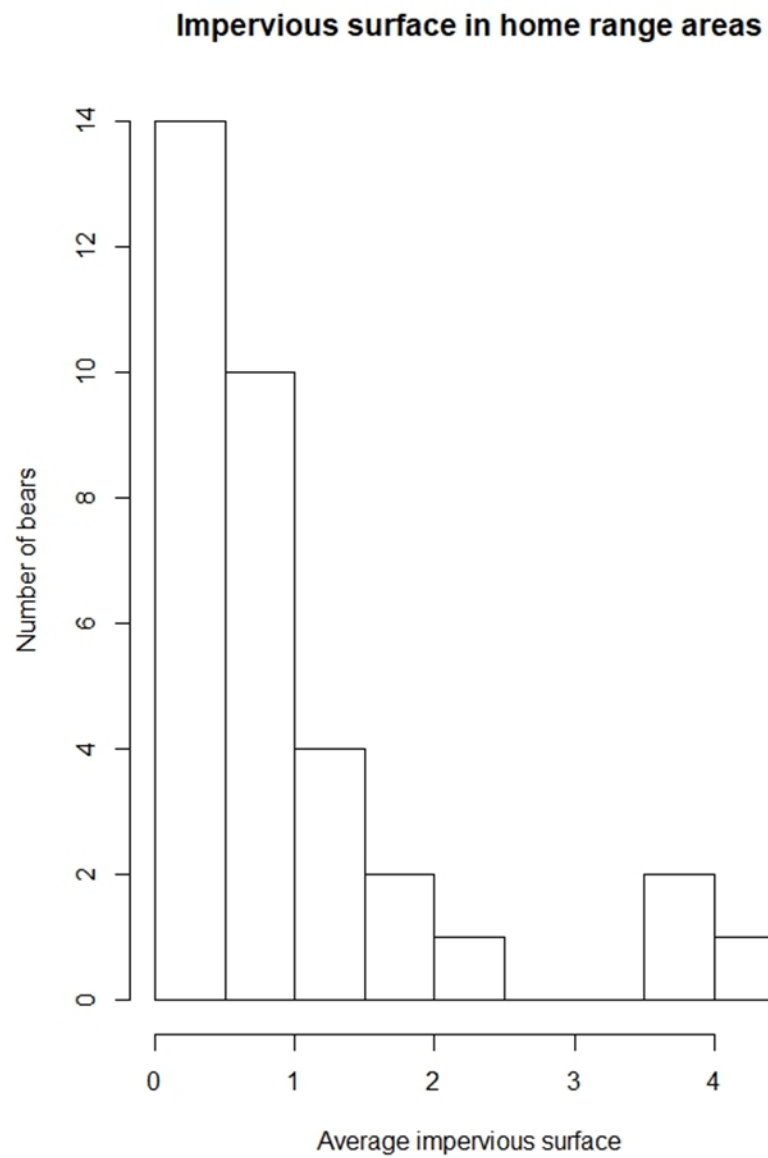

**Figure S1.** Average percent of impervious surface available within the fall home range areas (1 Sept –30 Nov) for each of the 34 female bears in the *research* group.

**Table S1.** A summary of each *research* bear's minimum convex polygon (MCP), mean impervious surface (% Imp. surf.) across the fall home range area, and the subgroup where each female was placed based on impervious surface. This subgroup determined the original assumption of food conditioning. The MCP values are reported in kilometers squared (km<sup>2</sup>) rounded to the nearest hundredth.

| Bear ID | 95% MCP | % Imp. surf. | Subgroup  |
|---------|---------|--------------|-----------|
| F600    | 45.18   | 0.59         | Wild      |
| F601    | 10.03   | 0.63         | Wild      |
| F602    | 43.17   | 1.67         | Developed |
| F603    | 136.79  | 0.26         | Wild      |
| F604    | 391.23  | 0.15         | Wild      |
| F605    | 167.96  | 0.21         | Wild      |
| F606    | 96.67   | 0.84         | Wild      |
| F607    | 56.80   | 0.18         | Wild      |
| F608    | 72.83   | 0.16         | Wild      |
| F609    | 48.26   | 0.16         | Wild      |
| F610    | 28.00   | 0.93         | Wild      |
| F611    | 7.50    | 0.45         | Wild      |
| F612    | 32.75   | 1.24         | Developed |
| F613    | 43.05   | 0.15         | Wild      |
| F614    | 94.28   | 0.39         | Wild      |
| F615    | 11.44   | 1.06         | Developed |
| F618    | 8.05    | 3.67         | Developed |
| F619    | 24.92   | 1.27         | Developed |
| F620    | 33.92   | 2.30         | Developed |
| F621    | 88.56   | 1.64         | Developed |
| F623    | 13.18   | 0.36         | Wild      |
| F624    | 71.22   | 0.40         | Wild      |
| F625    | 9.57    | 0.39         | Wild      |
| F626    | 46.42   | 0.72         | Wild      |
| F627    | 5.16    | 0.74         | Wild      |
| F628    | 139.22  | 0.68         | Wild      |
| F629    | 199.94  | 1.09         | Developed |
| F631    | 8.41    | 3.90         | Developed |
| F632    | 10.62   | 0.76         | Wild      |
| F633    | 48.74   | 0.35         | Wild      |
| F634    | 12.89   | 0.41         | Wild      |
| F635    | 69.82   | 0.58         | Wild      |
| F636    | 25.05   | 0.86         | Wild      |
| F637    | 8.12    | 4.46         | Developed |

**Table S2.** Individual, mean and SDs of stable isotope ( $\delta^{13}\text{C}$  and  $\delta^{15}\text{N}$ ) values of *anthropogenic* (A) and *management* (C) bears sampled throughout Florida during 2015-2017 and *wild* (B) and *developed* (D) bears sampled in and around Tate's Hell State Forest, Florida, USA, 2016-2017. Subadult age class includes bears aged 1-2.9 years. Diet-year denotes the capture year or prior year for *anthropogenic* and *management* bears, depending on month of capture, and the year prior to capture for *wild* and *developed* bears. LDA classification denotes the two categories (not food conditioned [NFC] or food conditioned [FC]) based on the linear discriminant analysis with leave-one-out cross validation. P-FC is the probability of each individual being food conditioned. While all *anthropogenic* bears were initially assumed to be FC, and all *wild* bears were initially assumed to be NFC, some bears from each subgroup, in bold, were reclassified based on the LDA outputs.

| Bear ID                                                                | Sex | Age Class | Diet-year | $\delta^{15}\text{N}$ (‰) | $\delta^{13}\text{C}$ (‰) | LDA Class. | P-FC  |
|------------------------------------------------------------------------|-----|-----------|-----------|---------------------------|---------------------------|------------|-------|
| <b>A. Anthropogenic bears captured 2015-2017 (<math>n = 28</math>)</b> |     |           |           |                           |                           |            |       |
| 16766                                                                  | F   | Adult     | 2014      | 7.01                      | -17.86                    | FC         | 0.992 |
| 16783                                                                  | M   | Adult     | 2014      | 6.3                       | -19.35                    | FC         | 0.954 |
| 17162                                                                  | M   | Adult     | 2015      | 3.75                      | -24.4                     | <b>NFC</b> | 0.03  |
| 17190                                                                  | M   | Subadult  | 2015      | 6.01                      | -19.2                     | FC         | 0.952 |
| 17233                                                                  | F   | Adult     | 2014      | 4.01                      | -23.02                    | <b>NFC</b> | 0.148 |
| 17355                                                                  | F   | Adult     | 2015      | 4.36                      | -22.01                    | <b>NFC</b> | 0.372 |
| 17356                                                                  | M   | Cub       | 2015      | 5.09                      | -21.62                    | FC         | 0.587 |
| 17357                                                                  | F   | Cub       | 2015      | 5.83                      | -22.06                    | FC         | 0.606 |
| 17485                                                                  | M   | Adult     | 2015      | 6.66                      | -16.75                    | FC         | 0.997 |
| 17522                                                                  | M   | Subadult  | 2015      | 8.66                      | -22.33                    | FC         | 0.829 |
| 17523                                                                  | F   | Adult     | 2015      | 6.83                      | -18.98                    | FC         | 0.976 |
| 17615                                                                  | M   | Subadult  | 2015      | 5.41                      | -20.22                    | FC         | 0.85  |
| 17617                                                                  | M   | Subadult  | 2015      | 7.61                      | -19.99                    | FC         | 0.965 |
| 17635                                                                  | F   | Subadult  | 2016      | 6.81                      | -19.16                    | FC         | 0.972 |
| 17985                                                                  | M   | Adult     | 2016      | 6.74                      | -17.11                    | FC         | 0.995 |
| 17987                                                                  | M   | Subadult  | 2015      | 5.56                      | -21.23                    | FC         | 0.73  |
| 18008                                                                  | F   | Adult     | 2016      | 7.28                      | -17.6                     | FC         | 0.993 |
| 18117                                                                  | F   | Subadult  | 2016      | 3.5                       | -21.42                    | <b>NFC</b> | 0.31  |
| 18123                                                                  | F   | Adult     | 2016      | 7.23                      | -23.95                    | <b>NFC</b> | 0.274 |
| 18201                                                                  | F   | Subadult  | 2016      | 3.02                      | -23.04                    | <b>NFC</b> | 0.057 |
| 18238                                                                  | M   | Adult     | 2016      | 6.68                      | -19.55                    | FC         | 0.957 |
| 18310                                                                  | F   | Subadult  | 2016      | 4.73                      | -21.35                    | FC         | 0.581 |
| 18335                                                                  | F   | Adult     | 2016      | 6.04                      | -19.31                    | FC         | 0.948 |
| 18344                                                                  | F   | Subadult  | 2016      | 8.04                      | -18                       | FC         | 0.996 |
| 18411                                                                  | F   | Subadult  | 2015      | 5.95                      | -20.83                    | FC         | 0.829 |
| 18529                                                                  | M   | Adult     | 2016      | 6.3                       | -19.86                    | FC         | 0.931 |
| 18705                                                                  | F   | Adult     | 2017      | 6.07                      | -19.18                    | FC         | 0.954 |

|             |   |       |      |      |        |    |       |
|-------------|---|-------|------|------|--------|----|-------|
| 18744       | F | Adult | 2017 | 6.55 | -19.96 | FC | 0.936 |
| <i>Mean</i> |   |       |      | 6    | -20.33 |    |       |
| <i>SD</i>   |   |       |      | 1.38 | 2.02   |    |       |

#### B. Wild bears 2016-2017 ( $n = 24$ )

|             |   |          |      |      |        |     |       |
|-------------|---|----------|------|------|--------|-----|-------|
| F600        | F | Adult    | 2015 | 5.49 | -24.26 | NFC | 0.185 |
| F601        | F | Adult    | 2015 | 5.06 | -23.49 | NFC | 0.238 |
| F603        | F | Adult    | 2015 | 4.92 | -24.24 | NFC | 0.134 |
| F604        | F | Adult    | 2015 | 4.76 | -23.4  | NFC | 0.216 |
| F605        | F | Adult    | 2015 | 3.68 | -20.58 | FC  | 0.687 |
| F606        | F | Adult    | 2015 | 4.79 | -23.81 | NFC | 0.167 |
| F607        | F | Adult    | 2015 | 4.04 | -23.98 | NFC | 0.098 |
| F608        | F | Adult    | 2015 | 5.84 | -20.4  | FC  | 0.899 |
| F609        | F | Adult    | 2015 | 4.39 | -24.52 | NFC | 0.079 |
| F610        | F | Adult    | 2015 | 4.14 | -21.82 | NFC | 0.431 |
| F611        | F | Adult    | 2015 | 3.99 | -21.95 | NFC | 0.382 |
| F613        | F | Adult    | 2015 | 5.3  | -23.84 | NFC | 0.217 |
| F614        | F | Adult    | 2015 | 4.8  | -24.11 | NFC | 0.137 |
| F623        | F | Adult    | 2016 | 3.49 | -25.07 | NFC | 0.029 |
| F624        | F | Adult    | 2016 | 3.3  | -25.14 | NFC | 0.025 |
| F625        | F | Adult    | 2016 | 3.68 | -24.6  | NFC | 0.049 |
| F626        | F | Adult    | 2016 | 3.48 | -22.28 | NFC | 0.258 |
| F627        | F | Juvenile | 2016 | 3.48 | -25.47 | NFC | 0.021 |
| F628        | F | Juvenile | 2016 | 3.81 | -24.72 | NFC | 0.048 |
| F632        | F | Adult    | 2016 | 3    | -25.1  | NFC | 0.021 |
| F633        | F | Adult    | 2016 | 6.91 | -24.41 | NFC | 0.413 |
| F634        | F | Adult    | 2016 | 5.02 | -24.67 | NFC | 0.104 |
| F635        | F | Adult    | 2016 | 4.16 | -21.77 | NFC | 0.445 |
| F636        | F | Juvenile | 2016 | 3.09 | -22.06 | NFC | 0.261 |
| <i>Mean</i> |   |          |      | 4.36 | -23.57 |     |       |
| <i>SD</i>   |   |          |      | 0.96 | 1.46   |     |       |

#### C. Management bears 2015-2017 ( $n = 17$ )

|       |   |          |      |      |        |     |       |
|-------|---|----------|------|------|--------|-----|-------|
| 17160 | F | Subadult | 2015 | 4.46 | -23.61 | NFC | 0.156 |
| 17166 | F | Adult    | 2015 | 5.38 | -23.87 | NFC | 0.209 |
| 17196 | M | Adult    | 2015 | 4.77 | -23.77 | NFC | 0.164 |
| 17213 | F | Subadult | 2015 | 5.73 | -19.83 | FC  | 0.911 |
| 17240 | M | Subadult | 2015 | 6.06 | -17.31 | FC  | 0.991 |
| 17246 | F | Adult    | 2015 | 4.3  | -23.52 | NFC | 0.153 |
| 17737 | M | Adult    | 2016 | 6.92 | -18.88 | FC  | 0.98  |
| 18061 | M | Subadult | 2016 | 6.92 | -19.70 | FC  | 0.96  |
| 18062 | M | Adult    | 2016 | 6.71 | -19.83 | FC  | 0.95  |
| 18070 | M | Subadult | 2016 | 4.05 | -21.74 | NFC | 0.411 |

|             |   |          |      |      |        |     |       |
|-------------|---|----------|------|------|--------|-----|-------|
| 18252       | M | Subadult | 2016 | 2.98 | -21.93 | NFC | 0.232 |
| 18258       | F | Adult    | 2016 | 5.47 | -19.77 | FC  | 0.901 |
| 18265       | M | Subadult | 2016 | 4.2  | -21.25 | FC  | 0.538 |
| 18301       | M | Adult    | 2016 | 4.83 | -20.01 | FC  | 0.833 |
| 18322       | M | Adult    | 2016 | 2.84 | -21.16 | NFC | 0.348 |
| 18533       | M | Subadult | 2016 | 3.83 | -22.69 | NFC | 0.213 |
| 18589       | M | Subadult | 2017 | 5.38 | -22.30 | FC  | 0.501 |
| <i>Mean</i> |   |          |      | 4.99 | -21.25 |     |       |
| <i>SD</i>   |   |          |      | 1.25 | 1.92   |     |       |

**D. Developed bears 2016-2017 (*n* = 10)**

|             |   |          |      |      |        |     |       |
|-------------|---|----------|------|------|--------|-----|-------|
| 602         | F | Adult    | 2015 | 5.07 | -23.86 | NFC | 0.18  |
| 612         | F | Adult    | 2015 | 5.79 | -22.54 | FC  | 0.515 |
| 615         | F | Adult    | 2015 | 4.22 | -22.41 | NFC | 0.306 |
| 618         | F | Adult    | 2016 | 5.21 | -22.56 | NFC | 0.42  |
| 619         | F | Adult    | 2016 | 5.51 | -24.54 | NFC | 0.14  |
| 620         | F | Adult    | 2016 | 3.51 | -24.17 | NFC | 0.059 |
| 621         | F | Adult    | 2016 | 5    | -23.96 | NFC | 0.162 |
| 629         | F | Adult    | 2016 | 4.24 | -23.12 | NFC | 0.196 |
| 631         | F | Juvenile | 2016 | 3.55 | -23.00 | NFC | 0.149 |
| 637         | F | Adult    | 2016 | 6.17 | -18.20 | FC  | 0.982 |
| <i>Mean</i> |   |          |      | 4.83 | -22.84 |     |       |
| <i>SD</i>   |   |          |      | 0.91 | 1.79   |     |       |

---
